# Supplementary material for: Pulmonary Artery Denervation Reduces Pulmonary Artery Pressure and Induces Histological Changes in an Acute Porcine Model of Pulmonary Hypertension
Source: PubMed Central journal article supplement (PMC4648184; doi:10.1161/circinterventions.115.002569), 2015-11-17
Supplement: hcv-8-e002569-s008.pdf [file hcv-8-e002569-s008.pdf]

SUPPLEMENTAL MATERIAL

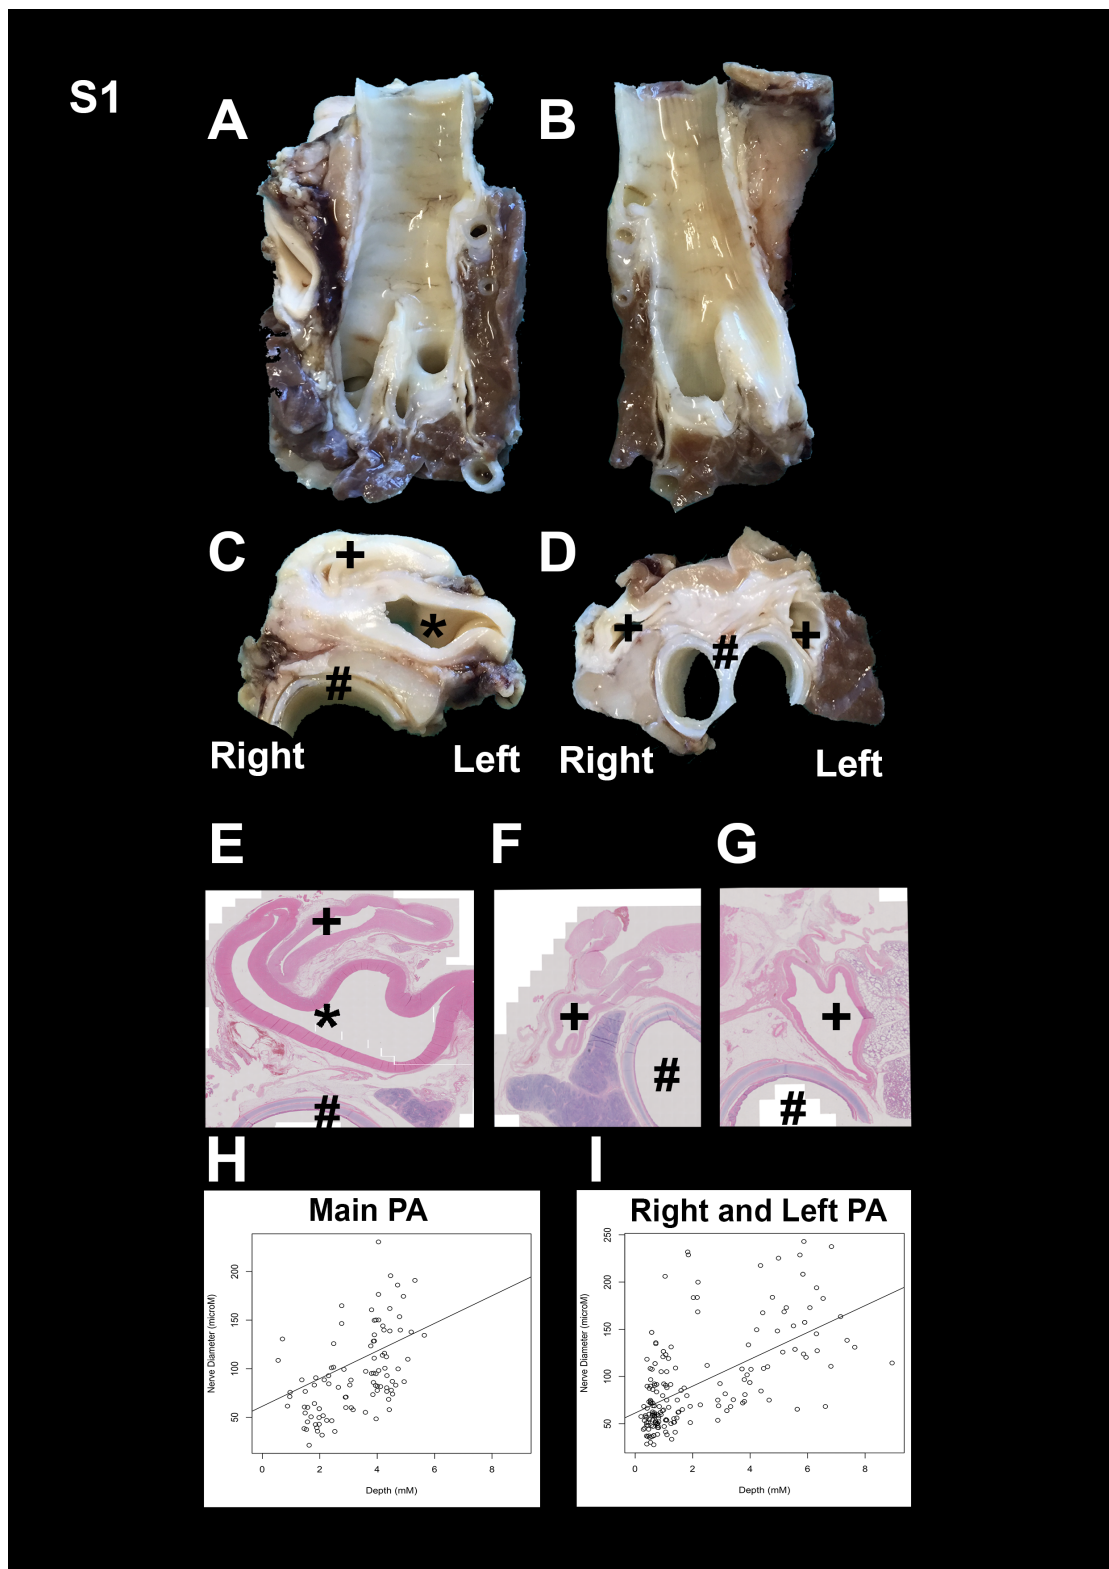

Supplemental Figure 1: Pulmonary artery anatomy, histology and nerve distribution:  
A and B: Excised blocks divided along the trachea to allow preparation of axial sections. C-D: Axial sections at the level of the main pulmonary artery (C) and right

and left pulmonary arteries (D, + pulmonary artery, \* aorta and # trachea/carina). E-F: Representative axial sections at the level of the main pulmonary artery (E) and right (F) and left (G) pulmonary arteries (+ pulmonary artery, \* aorta and # trachea/carina). H-I: Nerve diameter ( $\mu\text{m}$ ) and depth from luminal surface of the pulmonary artery (mm) at the level of the main pulmonary artery (H) and right and left pulmonary arteries (I).

**S2**

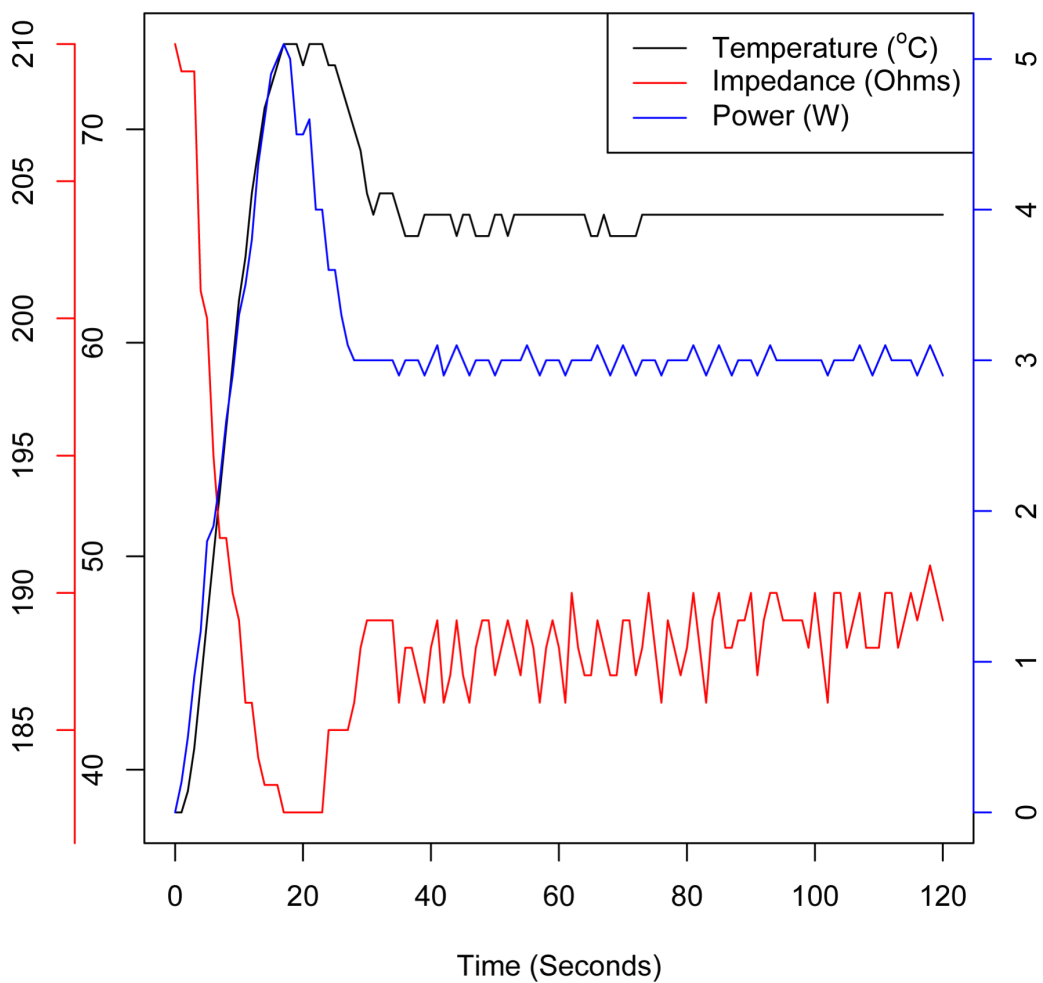

Supplemental Figure 2: Representative temperature ( $^{\circ}\text{C}$ , black), impedance (Ohms, red) and power (W, blue) data from a single pulmonary artery ablation.
